# Supplementary material for: Engineering a highly dispersed co-catalyst on a few-layered catalyst for efficient photocatalytic H2 evolution: a case study of Ni(OH)2/HNb3O8 nanocomposites
Source: Royal Society of Chemistry journal article supplement (doi:10.1039/c7cy01792h), 2017-01-01
Supplement: c7cy01792h1.pdf [file c7cy01792h1.pdf]

## Supporting Information

### **Engineering ultrahighly dispersed cocatalysts on few-layered catalyst for efficiently photocatalytic H<sub>2</sub> evolution: A case study of Ni(OH)<sub>2</sub>/HNb<sub>3</sub>O<sub>8</sub> nanocomposites**

Yuzhou Xia<sup>a</sup>, Weihang Chen<sup>b</sup>, Shijing Liang<sup>\*ab</sup>, Jinhong Bi<sup>ab</sup>, Ling Wu<sup>a</sup> and Xuxu Wang<sup>\*a</sup>

<sup>a</sup>State Key Laboratory of Photocatalysis on Energy and Environment, Fuzhou University, Fuzhou  
350002, People's Republic of China

<sup>b</sup>Department of Environmental Science and Engineering, Fuzhou University, Minhou, Fujian,  
350108, People's Republic of China

E-mail address: sjliang2011@gmail.com (S. Liang), xwang@fzu.edu.cn (X. Wang).

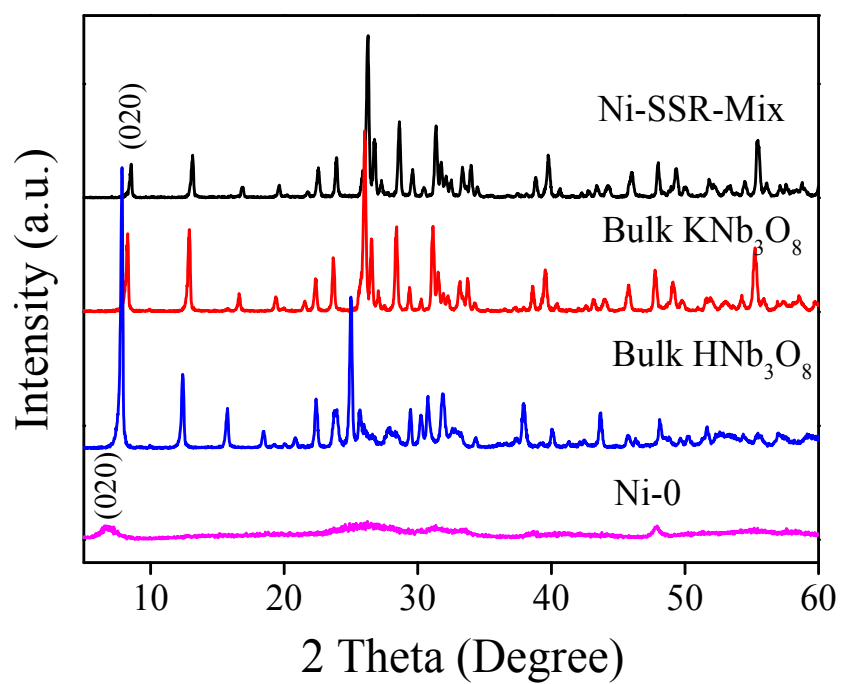

Fig. S1 XRD patterns of Ni-SSR-Mix, bulk  $\text{KNb}_3\text{O}_8$ , bulk  $\text{HNb}_3\text{O}_8$  and Ni-0.

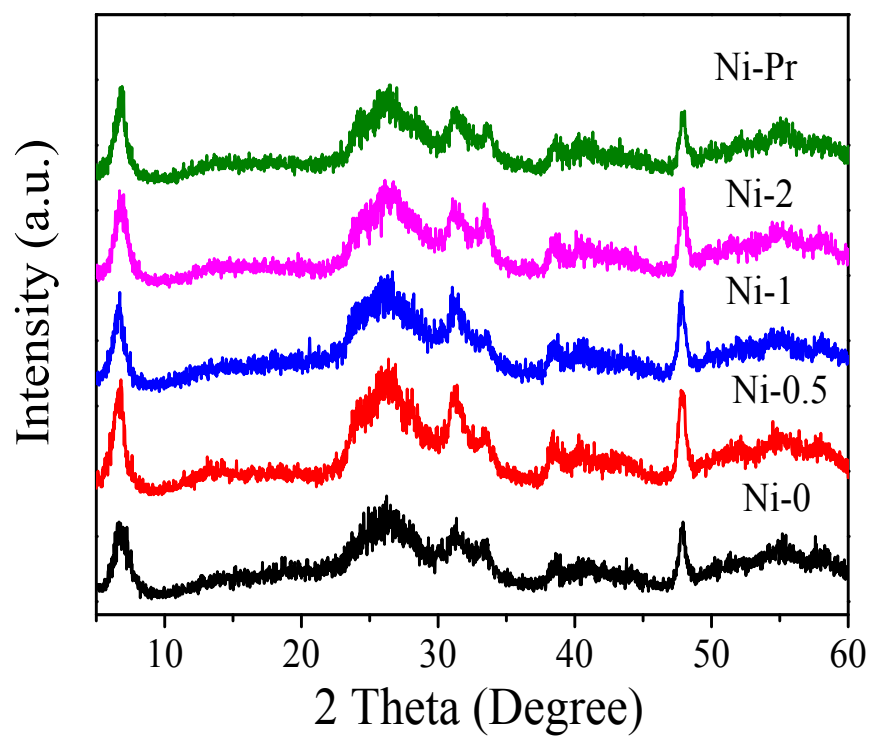

Fig. S2 XRD patterns of Ni-0, Ni-0.5, Ni-1, Ni-2, Ni-Pr.

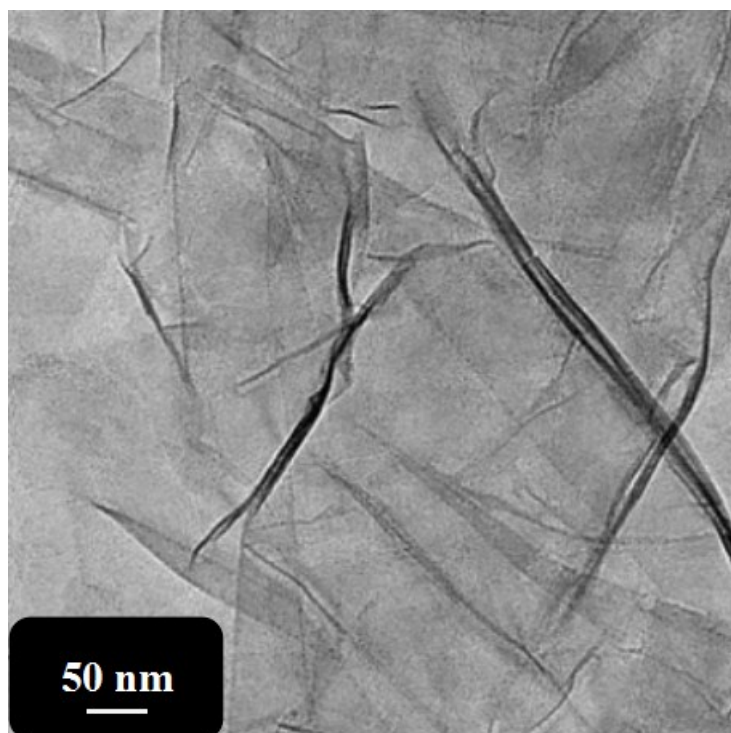

Fig. S3 TEM images of  $\text{Nb}_3\text{O}_8^-$  colloidal solution.

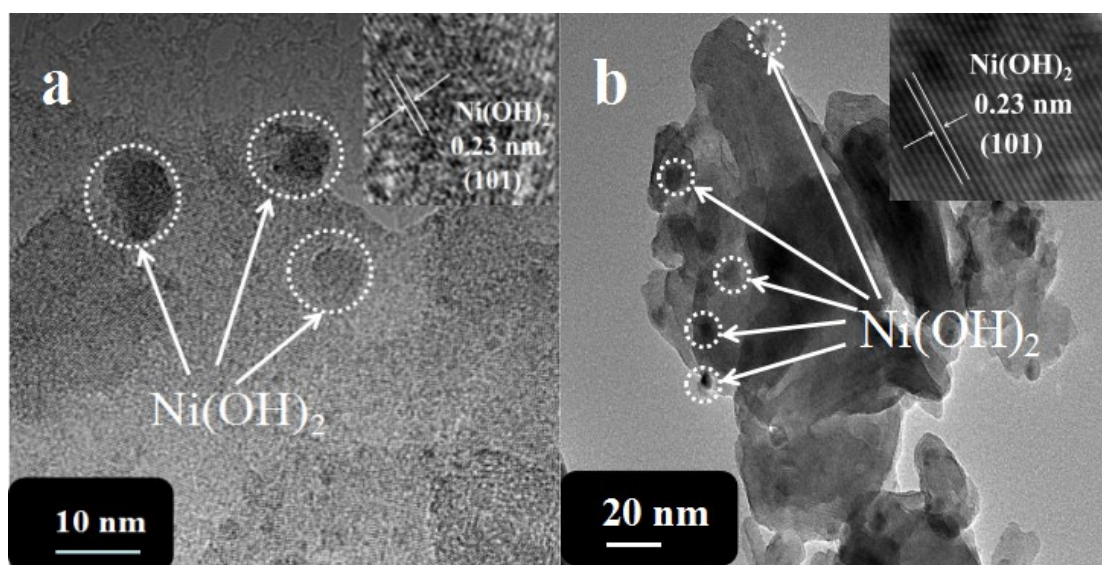

Fig. S4 TEM images of Ni-Pr (a) and Ni-Mix (b).

**Table S1** Surface area and the photocatalytic activity of the samples

| Sample     | $S_{\text{BET}}$ (m <sup>2</sup> /g) | Ni (wt.%) | $R_1^a$ (μmol h <sup>-1</sup> g <sup>-1</sup> ) | $R_2^b$ (μmol h <sup>-1</sup> m <sup>-2</sup> ) |
|------------|--------------------------------------|-----------|-------------------------------------------------|-------------------------------------------------|
| Ni-SSR-Mix | 0.4                                  | 0.54      | 16.9                                            |                                                 |
| Ni-0       | 23.5                                 | -         | 7.1                                             |                                                 |
| Ni-Pr      | 20.1                                 | 0.42      | 97.3                                            | 4.8                                             |
| Ni-1       | 25.9                                 | 0.45      | 265.4                                           | 10.2                                            |

<sup>a</sup>Production rate of H<sub>2</sub>; <sup>b</sup>Production rate of H<sub>2</sub> normalized by the surface area.
